# Supplementary material for: Lifestyle Related Cancer Risk and Protective Behaviors Vary among a Convenient Sample of Physically Active, Young-to-Middle-Aged Adults 18–49
Source: MDPI journal article supplement (doi:10.3390/ijerph20136305), 2023-07-06
Supplement: s1 [file s1]

**Supplementary Tables**

Table S1

| Cancer-Related Risk and Protective Behaviors among Physically Active, Young-to-Middle Aged Adults 18-49. Variables were to create dichotomous healthy or unhealthy behaviors in the study. |                    |             |
|--------------------------------------------------------------------------------------------------------------------------------------------------------------------------------------------|--------------------|-------------|
| Lifestyle Behavior                                                                                                                                                                         | Study Sample n (%) |             |
| <i>Physical Activity</i>                                                                                                                                                                   |                    |             |
|                                                                                                                                                                                            | 0 days per week    | 27 (3.1%)   |
|                                                                                                                                                                                            | 1 day per week     | 55 (6.3%)   |
|                                                                                                                                                                                            | 2 days per week    | 104 (11.9%) |
|                                                                                                                                                                                            | 3 days per week    | 207 (23.8%) |
|                                                                                                                                                                                            | 4 days per week    | 152 (17.5%) |
|                                                                                                                                                                                            | 5 days per week    | 160 (18.4%) |
|                                                                                                                                                                                            | 6 days per week    | 61 (7.0%)   |
|                                                                                                                                                                                            | 7 days per week    | 102 (11.7%) |
|                                                                                                                                                                                            | Don't Know         | 3 (0.3%)    |
| <i>Fruit Consumption</i>                                                                                                                                                                   |                    |             |
|                                                                                                                                                                                            | None               | 63 (7.2%)   |
|                                                                                                                                                                                            | 1/2 cup or less    | 169 (19.4%) |
|                                                                                                                                                                                            | 1/2 to 1 cup       | 195 (22.4%) |
|                                                                                                                                                                                            | 1 to 2 cups        | 247 (28.4%) |

|                |             |
|----------------|-------------|
| 2 to 3 cups    | 119 (13.7%) |
| 3 to 4 cups    | 41 (4.7%)   |
| 4 or more cups | 36 (4.1%)   |

*Vegetable Consumption*

|                |             |
|----------------|-------------|
| None           | 71 (8.4%)   |
| 1/2 cup        | 150 (17.2%) |
| 1/2 to 1 cup   | 183 (21.0%) |
| 1 to 2 cups    | 232 (26.6%) |
| 2 to 3 cups    | 122 (14.0%) |
| 3 to 4 cups    | 75 (8.6%)   |
| 4 or more cups | 39 (4.5%)   |

*Current Cigarette Smoking Status*

|            |             |
|------------|-------------|
| Every day  | 118 (13.6%) |
| Some days  | 84 (9.7%)   |
| Not at all | 665 (76.7%) |

*Current E-cigarette and "Vape" Use Status*

|           |             |
|-----------|-------------|
| Every day | 49 (5.7%)   |
| Some days | 100 (11.6%) |

|                                       |                  |             |
|---------------------------------------|------------------|-------------|
| <i>Chewing Tobacco, Snuff or Snus</i> | Not at all       | 715 (82.8%) |
|                                       | Every day        | 26 (3.0%)   |
|                                       | Some days        | 46 (5.3%)   |
|                                       | Not at all       | 795 (91.7%) |
| <i>Any Past 30-Day Alcohol Use</i>    |                  |             |
|                                       | Yes              | 676 (77.4%) |
|                                       | No               | 197 (22.6%) |
| <i>Binge Drinking</i>                 |                  |             |
| Yes                                   |                  |             |
|                                       | Men              | 273 (61.9%) |
|                                       | Women            | 248 (62.3%) |
|                                       |                  | 318 (37.9%) |
|                                       | Men              | 168 (38.1%) |
|                                       | Women            | 150 (37.7%) |
| No                                    |                  |             |
|                                       | Men              | 168 (38.1%) |
|                                       | Women            | 150 (37.7%) |
|                                       |                  |             |
|                                       | Men              | 168 (38.1%) |
|                                       | Women            | 150 (37.7%) |
| <i>Use of Sun Protection</i>          |                  |             |
|                                       | Always           | 90 (10.7%)  |
|                                       | Most of the time | 189 (23.4%) |
|                                       | Sometimes        | 249 (29.5%) |
|                                       | Rarely           | 197 (23.3%) |
|                                       | Never            | 101 (12.0%) |
|                                       |                  |             |

|                                                              |           |
|--------------------------------------------------------------|-----------|
| Don't stay outside for more than one hour on warm sunny days | 16 (1.9%) |
| Don't go outside at all on warm sunny days                   | 3 (.4%)   |

*Routine Doctor Visits*

|     |             |
|-----|-------------|
| Yes | 672 (79.5%) |
| No  | 173 (20.5%) |

---

Table S2

| Cumulative healthy behaviors present and all combinations with $\geq 3$ Days of physical activity stratified by sex |                                           | Overall n (%) | Men (n)%    | Women (n)%  |
|---------------------------------------------------------------------------------------------------------------------|-------------------------------------------|---------------|-------------|-------------|
| 0                                                                                                                   | No healthy behaviors reported             | 32 (4.4%)     | 14 (3.6%)   | 18 (5.4%)   |
| 1                                                                                                                   | Physical activity only (P)                | 61 (8.4%)     | 41 (10.4%)  | 20 (6.0%)   |
|                                                                                                                     | Fruit and Vegetable Consumption only (D)  | 4 (0.5%)      | 2 (0.5%)    | 2 (0.6%)    |
|                                                                                                                     | No current tobacco use only (S)           | 38 (5.2%)     | 19 (4.8%)   | 19 (5.7%)   |
|                                                                                                                     | No binge drinking only (A)                | 8 (1.1%)      | 5 (1.3%)    | 3 (0.9%)    |
|                                                                                                                     | Safe/Optimal sun protection use only (SP) | 12 (1.6%)     | 8 (2.0%)    | 4 (1.2%)    |
|                                                                                                                     | Total                                     | 123 (16.8%)   | 75 (19.0%)  | 48 (14.3%)  |
| 2                                                                                                                   | P + D                                     | 33 (4.5%)     | 23 (5.8%)   | 10 (3.0%)   |
|                                                                                                                     | P + S                                     | 122 (16.7%)   | 56 (14.2%)  | 66 (19.6%)  |
|                                                                                                                     | P + A                                     | 29 (4.0%)     | 20 (5.1%)   | 9 (2.7%)    |
|                                                                                                                     | P + SP                                    | 44 (6.0%)     | 26 (6.6%)   | 18 (5.4%)   |
|                                                                                                                     | Total                                     | 228 (31.2%)   | 125 (31.7%) | 103 (30.7%) |
| 3                                                                                                                   | P + D + S                                 | 38 (5.2%)     | 18 (4.6%)   | 20 (6.0%)   |
|                                                                                                                     | P + D + A                                 | 3 (0.4%)      | 3 (0.8%)    | 0 (0%)      |
|                                                                                                                     | P + D + SP                                | 18 (2.5%)     | 10 (2.5%)   | 8 (2.4%)    |
|                                                                                                                     | P + S + A                                 | 103 (14.1%)   | 60 (15.2%)  | 43 (12.8%)  |
|                                                                                                                     | P + S + SP                                | 53 (7.3%)     | 28 (7.1%)   | 25 (7.4%)   |
|                                                                                                                     | P + A + SP                                | 13 (1.8%)     | 8 (2.0%)    | 5 (1.5%)    |
|                                                                                                                     | Total                                     | 228 (31.2%)   | 127 (32.2%) | 101 (30.1%) |

|         |                    |            |            |            |
|---------|--------------------|------------|------------|------------|
| 4       |                    |            |            |            |
|         | P + D + S + A      | 19 (2.6%)  | 9 (2.3%)   | 10 (3.0%)  |
|         | P + D + S + SP     | 22 (3.0%)  | 12 (3.0%)  | 10 (3.0%)  |
|         | P + S + A + SP     | 45 (6.2%)  | 19 (4.8%)  | 26 (7.7%)  |
|         | P + A + SP + D     | 4 (0.5%)   | 3 (0.8%)   | 1 (0.3%)   |
|         | Total              | 90 (12.3%) | 43 (10.9%) | 47 (14.0%) |
| 5       |                    |            |            |            |
|         | P + D + S + A + SP | 29 (4.0%)  | 10 (2.5%)  | 19 (5.7%)  |
| Overall |                    | 730        | 394        | 336        |

Number of healthy lifestyle behavior within mutually exclusive combinations of physical activity.

Proportions are column percentages.

Observations with any missing health behaviors were excluded from the analysis.

Table S3

| Cumulative unhealthy behaviors present and all combinations with $\leq 2$ physical inactivity stratified by sex |                                                |              |            |            |
|-----------------------------------------------------------------------------------------------------------------|------------------------------------------------|--------------|------------|------------|
|                                                                                                                 |                                                | Overall (n)% | Men (n)%   | Women (n)% |
| 0                                                                                                               | No unhealthy behaviors reported                | 29 (9.9%)    | 10 (7.5%)  | 19 (11.9%) |
| 1                                                                                                               | Physical inactivity only (P)                   | 1 (0.3%)     | 1 (0.8%)   | 0 (0%)     |
|                                                                                                                 | No Fruit and Vegetable Consumption only (D)    | 45 (15.4%)   | 19 (14.3%) | 26 (16.4%) |
|                                                                                                                 | Current tobacco use only (S)                   | 4 (1.4%)     | 3 (2.3%)   | 1 (0.6%)   |
|                                                                                                                 | Binge drinking only (A)                        | 22 (7.5%)    | 12 (9.0%)  | 10 (6.3%)  |
|                                                                                                                 | Unsafe/Suboptimal sun protection use only (SP) | 19 (6.5%)    | 9 (6.8%)   | 10 (6.3%)  |
|                                                                                                                 | Total                                          | 91 (31.2%)   | 44 (33.1%) | 47 (29.6%) |
| 2                                                                                                               | P + D                                          | 14 (4.8%)    | 7 (5.3%)   | 7 (4.4%)   |
|                                                                                                                 | P + S                                          | 0 (0%)       | 0 (0%)     | 0 (0%)     |
|                                                                                                                 | P + A                                          | 2 (0.7%)     | 0 (0%)     | 2 (1.3%)   |
|                                                                                                                 | P + SP                                         | 3 (1.0%)     | 0 (0%)     | 3 (1.9%)   |
|                                                                                                                 | Total                                          | 19 (6.5%)    | 7 (5.3%)   | 12 (7.5%)  |
| 3                                                                                                               | P + D + S                                      | 1 (0.3%)     | 1 (0.8%)   | 0 (0%)     |

|         |                    |            |            |            |
|---------|--------------------|------------|------------|------------|
|         | P + D + A          | 15 (5.1%)  | 4 (3.0%)   | 11 (6.9%)  |
|         | P + D + SP         | 34 (11.6%) | 15 (11.3%) | 19 (11.9%) |
|         | P + S + A          | 1 (0.3%)   | 1 (0.8%)   | 0 (0%)     |
|         | P + S + SP         | 2 (0.7%)   | 2 (1.5%)   | 0 (0%)     |
|         | P + A + SP         | 6 (2.1%)   | 1 (0.8%)   | 5 (3.1%)   |
|         | Total              | 59 (20.2%) | 24 (18.0%) | 35 (22.0%) |
| 4       | P + D + S + A      | 12 (4.1%)  | 8 (6.0%)   | 4 (2.5%)   |
|         | P + D + S + SP     | 8 (2.7%)   | 5 (3.8%)   | 3 (1.9%)   |
|         | P + S + A + SP     | 4 (1.4%)   | 2 (1.5%)   | 2 (1.3%)   |
|         | P + A + SP + D     | 38 (13.0%) | 19 (14.3%) | 19 (11.9%) |
|         | Total              | 62 (21.2%) | 34 (25.6%) | 28 (17.6%) |
| 5       | P + D + S + A + SP | 32 (11.0%) | 14 (10.5%) | 18 (11.3%) |
| Overall |                    | 292        | 133        | 159        |

---

Number of unhealthy lifestyle behavior within mutually exclusive combinations of physical activity.

Proportions are column percentages.

Observations with any missing health behaviors were excluded from the analysis.
